# Supplementary material for: Efficient and Fast Removal of Aqueous Tungstate by an Iron-Based LDH Delaminated in L-Asparagine
Source: MDPI journal article supplement (doi:10.3390/ijerph19127280), 2022-06-14
Supplement: s1 [file s1]

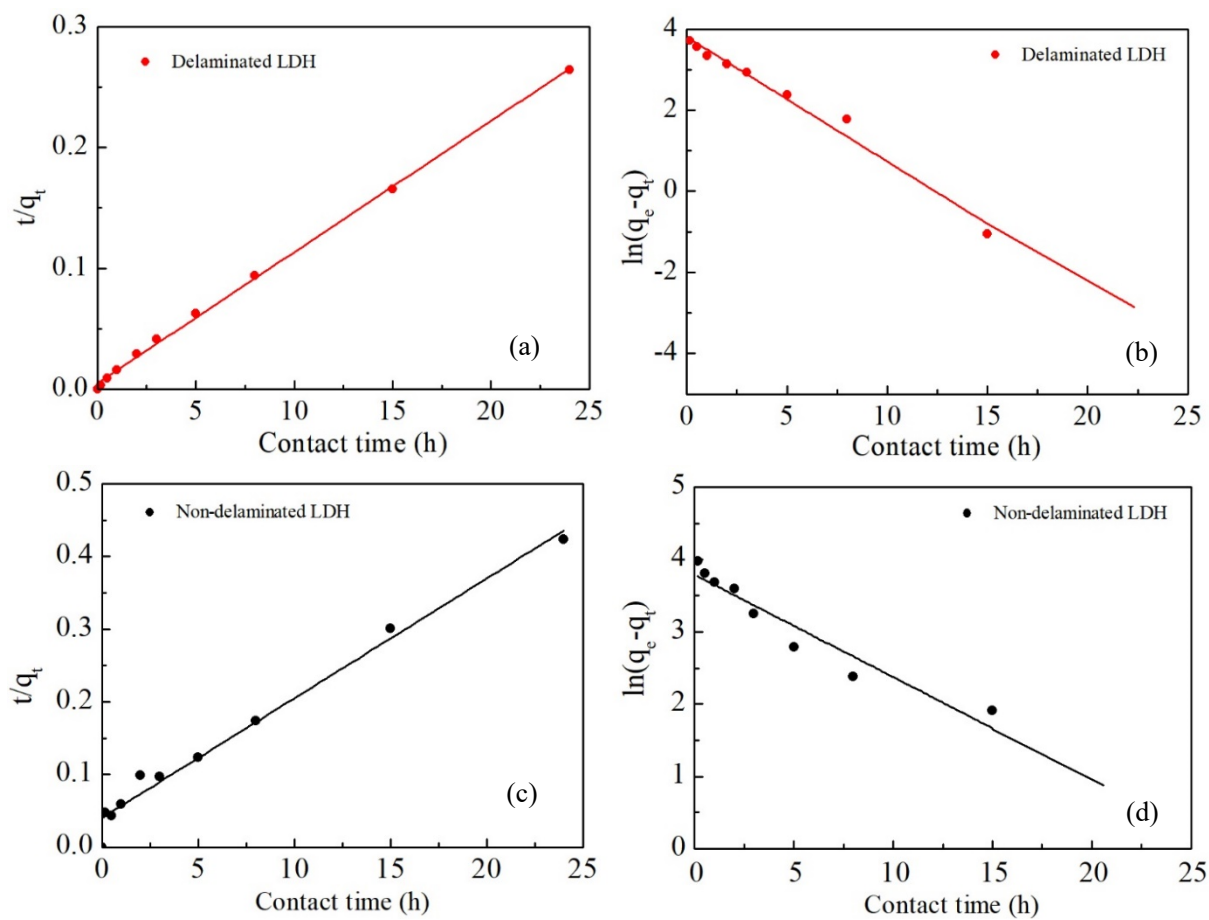

Figure S2. The fitting plots of the pseudo first-order model (a, c) and pseudo second-order model (b, d) for delaminated and non-delaminated iron-based LDH.
