# Supplementary material for: Efficient and Fast Removal of Aqueous Tungstate by an Iron-Based LDH Delaminated in L-Asparagine
Source: MDPI journal article supplement (doi:10.3390/ijerph19127280), 2022-06-14
Supplement: s1 [file s1]

Table S5. Effects of co-existing anions on tungstate removal by delaminated iron-based LDH at an initial tungsten concentration of 1mM.

| Co-existing anions                                                                                                                                   | Cl <sup>-</sup> /HCO <sub>3</sub> <sup>-</sup> /SO <sub>4</sub> <sup>2-</sup> /<br>PO <sub>4</sub> <sup>3-</sup><br>concentration<br>(mmol/L) | Initial W<br>concentration<br>(mmol/L) | Equilibrium W<br>concentration<br>(mmol/L) | Removal<br>percent<br>(%) | Sorption<br>capacity<br>(mg/g) |
|------------------------------------------------------------------------------------------------------------------------------------------------------|-----------------------------------------------------------------------------------------------------------------------------------------------|----------------------------------------|--------------------------------------------|---------------------------|--------------------------------|
| Only<br>WO <sub>4</sub> <sup>2-</sup>                                                                                                                | 0                                                                                                                                             | 1                                      | 0.387                                      | 61.3                      | 56.3                           |
| WO <sub>4</sub> <sup>2-</sup> +Cl <sup>-</sup>                                                                                                       | 1                                                                                                                                             | 1                                      | 0.458                                      | 54.2                      | 49.8                           |
| WO <sub>4</sub> <sup>2-</sup><br>+HCO <sub>3</sub> <sup>-</sup>                                                                                      | 1                                                                                                                                             | 1                                      | 0.491                                      | 50.9                      | 46.8                           |
| WO <sub>4</sub> <sup>2-</sup><br>+SO <sub>4</sub> <sup>2-</sup>                                                                                      | 1                                                                                                                                             | 1                                      | 0.524                                      | 47.6                      | 43.8                           |
| WO <sub>4</sub> <sup>2-</sup><br>+PO <sub>4</sub> <sup>3-</sup>                                                                                      | 1                                                                                                                                             | 1                                      | 0.732                                      | 26.8                      | 24.6                           |
| WO <sub>4</sub> <sup>2-</sup> +Cl <sup>-</sup><br>+HCO <sub>3</sub> <sup>-</sup><br>+SO <sub>4</sub> <sup>2-</sup><br>+PO <sub>4</sub> <sup>3-</sup> | 4 <sup>a</sup>                                                                                                                                | 1                                      | 0.803                                      | 19.7                      | 18.1                           |

<sup>a</sup>: Cl<sup>-</sup>, HCO<sub>3</sub><sup>-</sup>, SO<sub>4</sub><sup>2-</sup> and PO<sub>4</sub><sup>3-</sup> coexisted in the solution at a concentration of 1 mmol/L for each anion, i.e., the total concentration of coexisting anions was 4 mmol/L except for tungstate.
