# Supplementary material for: Efficient and Fast Removal of Aqueous Tungstate by an Iron-Based LDH Delaminated in L-Asparagine
Source: MDPI journal article supplement (doi:10.3390/ijerph19127280), 2022-06-14
Supplement: s1 [file s1]

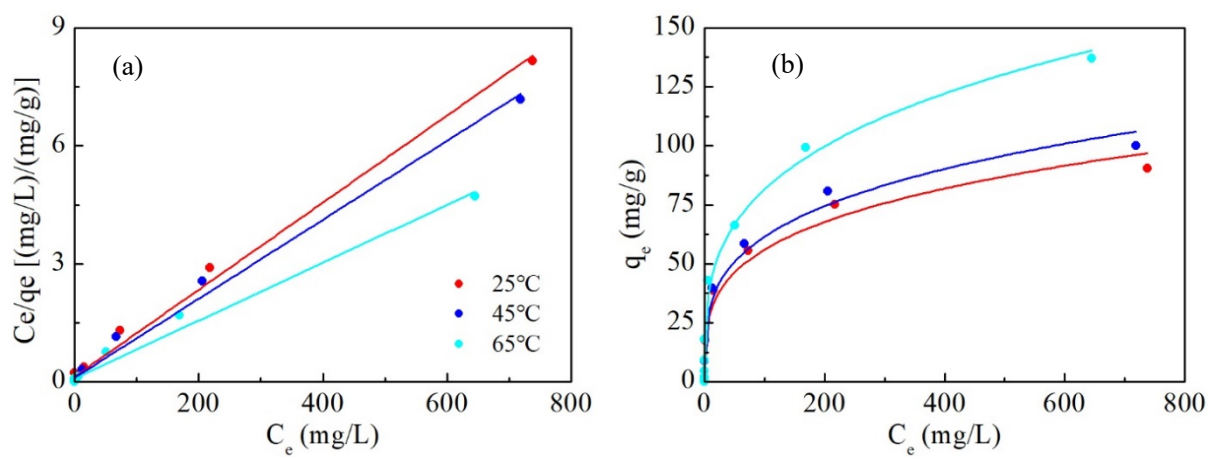

Figure S3. Isotherms of tungstate sorbed onto delaminated iron-based LDH and their fits to Langmuir model (a) and Freundlich model (b).
