# Supplementary material for: Efficient and Fast Removal of Aqueous Tungstate by an Iron-Based LDH Delaminated in L-Asparagine
Source: MDPI journal article supplement (doi:10.3390/ijerph19127280), 2022-06-14
Supplement: s1 [file s1]

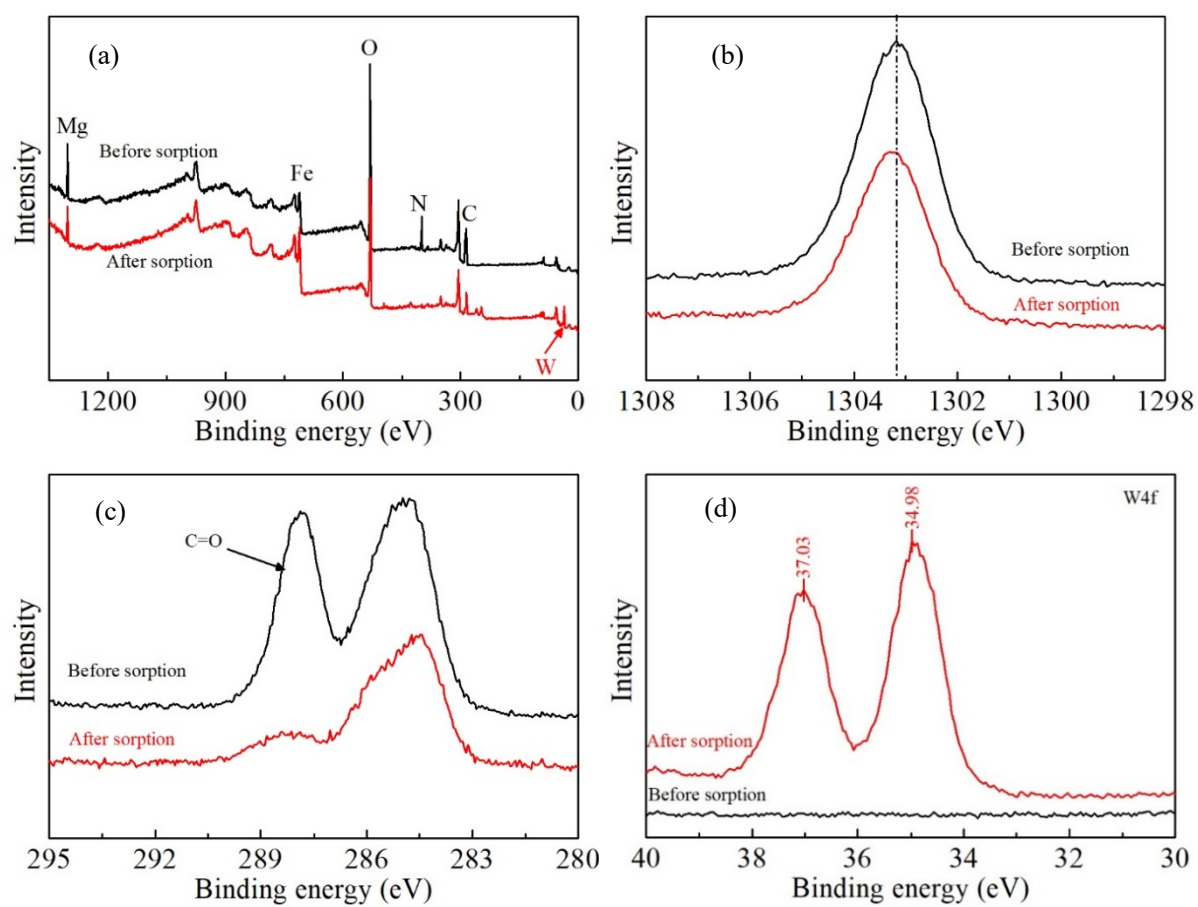

Figure S6. XPS spectra of delaminated iron-based LDH. The wide scan of the amorphous LDH before and after sorption (a), the narrow scan of Mg 1s (b), C 1s (c), and W 4f (d).
