# Supplementary material for: Efficient and Fast Removal of Aqueous Tungstate by an Iron-Based LDH Delaminated in L-Asparagine
Source: MDPI journal article supplement (doi:10.3390/ijerph19127280), 2022-06-14
Supplement: s1 [file s1]

Table S2. Experimental isotherm data of tungsten removal by delaminated iron-based LDH.

| 25 °C                 |                       |                       |       | 45 °C                 |                       |                       |       |
|-----------------------|-----------------------|-----------------------|-------|-----------------------|-----------------------|-----------------------|-------|
| c <sub>o</sub> (mg/L) | c <sub>e</sub> (mg/L) | q <sub>e</sub> (mg/g) | R (%) | c <sub>o</sub> (mg/L) | c <sub>e</sub> (mg/L) | q <sub>e</sub> (mg/g) | R (%) |
| 0.0184                | 0.002                 | 0.008                 | 89.7  | 0.0184                | 0.0007                | 0.009                 | 96.2  |
| 0.0919                | 0.004                 | 0.044                 | 96.2  | 0.0919                | 0.001                 | 0.045                 | 99.0  |
| 0.184                 | 0.003                 | 0.090                 | 98.4  | 0.184                 | 0.001                 | 0.091                 | 99.2  |
| 0.919                 | 0.008                 | 0.455                 | 99.1  | 0.919                 | 0.007                 | 0.456                 | 99.2  |
| 1.84                  | 0.017                 | 0.911                 | 99.1  | 1.84                  | 0.014                 | 0.912                 | 99.3  |
| 3.68                  | 0.032                 | 1.82                  | 99.1  | 3.68                  | 0.038                 | 1.82                  | 99.0  |
| 9.19                  | 0.108                 | 4.54                  | 98.8  | 9.19                  | 0.095                 | 4.55                  | 99.0  |
| 18.4                  | 0.353                 | 9.01                  | 98.1  | 18.4                  | 0.397                 | 8.99                  | 97.8  |
| 36.8                  | 1.77                  | 17.5                  | 95.2  | 36.8                  | 0.943                 | 17.9                  | 97.4  |
| 91.9                  | 14.7                  | 38.6                  | 84.0  | 91.9                  | 12.4                  | 39.7                  | 86.5  |
| 184                   | 72.7                  | 55.5                  | 60.4  | 184                   | 71.8                  | 56.0                  | 61.0  |
| 368                   | 218                   | 75.0                  | 40.8  | 368                   | 184                   | 91.7                  | 49.9  |
| 919                   | 738                   | 90.5                  | 19.7  | 919                   | 719                   | 100                   | 21.8  |

  

| 65 °C                 |                       |                       |       |
|-----------------------|-----------------------|-----------------------|-------|
| c <sub>o</sub> (mg/L) | c <sub>e</sub> (mg/L) | q <sub>e</sub> (mg/g) | R (%) |
| 0.0184                | 0.0001                | 0.009                 | 99.6  |
| 0.0919                | 0.0003                | 0.046                 | 99.6  |
| 0.184                 | 0.003                 | 0.090                 | 98.5  |
| 0.919                 | 0.004                 | 0.457                 | 99.5  |
| 1.84                  | 0.007                 | 0.915                 | 99.6  |
| 3.68                  | 0.018                 | 1.83                  | 99.5  |
| 9.19                  | 0.061                 | 4.56                  | 99.3  |
| 18.4                  | 0.131                 | 9.12                  | 99.3  |
| 36.8                  | 0.565                 | 18.1                  | 98.5  |
| 91.9                  | 5.81                  | 43.0                  | 93.7  |
| 184                   | 51.0                  | 66.4                  | 72.3  |
| 368                   | 169                   | 99.4                  | 54.1  |
| 919                   | 645                   | 137                   | 29.8  |
