# Supplementary material for: Efficient and Fast Removal of Aqueous Tungstate by an Iron-Based LDH Delaminated in L-Asparagine
Source: MDPI journal article supplement (doi:10.3390/ijerph19127280), 2022-06-14
Supplement: s1 [file s1]

Table S3. Experimental isotherm data of tungsten removal by non-delaminated iron-based LDH at 25°C.

| Initial W concentration<br>(mg/L) | Equilibrium W<br>concentration (mg/L) | Removal<br>percent (%) | Sorption capacity<br>(mg/g) |
|-----------------------------------|---------------------------------------|------------------------|-----------------------------|
| 1.838                             | 0.0202                                | 98.90                  | 0.9089                      |
| 9.190                             | 0.1102                                | 98.80                  | 4.540                       |
| 18.38                             | 2.801                                 | 84.76                  | 7.790                       |
| 91.90                             | 30.33                                 | 66.99                  | 30.78                       |
| 183.8                             | 103.3                                 | 43.82                  | 40.27                       |
| 367.6                             | 253.0                                 | 31.19                  | 57.32                       |
| 919.0                             | 802.3                                 | 12.70                  | 58.37                       |
