# Supplementary material for: Efficient and Fast Removal of Aqueous Tungstate by an Iron-Based LDH Delaminated in L-Asparagine
Source: MDPI journal article supplement (doi:10.3390/ijerph19127280), 2022-06-14
Supplement: s1 [file s1]

Table S1. The mass balance of delaminated iron-based LDH during the preparation.

| Items                                                             | Values  | Items                                                             | Values  |
|-------------------------------------------------------------------|---------|-------------------------------------------------------------------|---------|
| Total mass of delaminated LDH after freeze drying                 | 7.268 g |                                                                   |         |
| Amount of Mg added for preparation                                | 1.44 g  | Amount of Fe added for preparation                                | 1.12 g  |
| Percentage of Mg content in delaminated LDH obtained by digestion | 17.77%  | Percentage of Fe content in delaminated LDH obtained by digestion | 13.90%  |
| Amount of Mg in delaminated LDH after freeze drying               | 1.292 g | Amount of Fe in delaminated LDH after freeze drying               | 1.010 g |
| Recovery of Mg in the preparation of delaminated LDH              | 89.71%  | Recovery of Fe in the preparation of delaminated LDH              | 90.18%  |
