# Supplementary material for: Efficient and Fast Removal of Aqueous Tungstate by an Iron-Based LDH Delaminated in L-Asparagine
Source: MDPI journal article supplement (doi:10.3390/ijerph19127280), 2022-06-14
Supplement: s1 [file s1]

Table S4. Effects of pH on tungstate removal by delaminated iron-based LDH at an initial tungsten concentration of 1mM.

| Initial<br>pH | Equilibrium<br>pH | Initial W<br>concentration<br>(mg/L) | Equilibrium W<br>concentration<br>(mg/L) | Removal<br>percent (%) | Sorption<br>capacity<br>(mg/g) |
|---------------|-------------------|--------------------------------------|------------------------------------------|------------------------|--------------------------------|
| 2             | 3.08              | 115.7                                | 0.00903                                  | 99.99                  | 57.85                          |
| 4             | 8.89              | 183.8                                | 78.46                                    | 57.31                  | 52.67                          |
| 6             | 9.13              | 183.8                                | 80.24                                    | 56.34                  | 51.78                          |
| 8             | 9.12              | 183.8                                | 78.17                                    | 57.47                  | 52.82                          |
| 10            | 9.15              | 183.8                                | 81.97                                    | 55.40                  | 50.91                          |
| 12            | 11.54             | 183.8                                | 142.6                                    | 22.40                  | 20.58                          |
