# Supplementary material for: Efficient and Fast Removal of Aqueous Tungstate by an Iron-Based LDH Delaminated in L-Asparagine
Source: MDPI journal article supplement (doi:10.3390/ijerph19127280), 2022-06-14
Supplement: s1 [file s1]

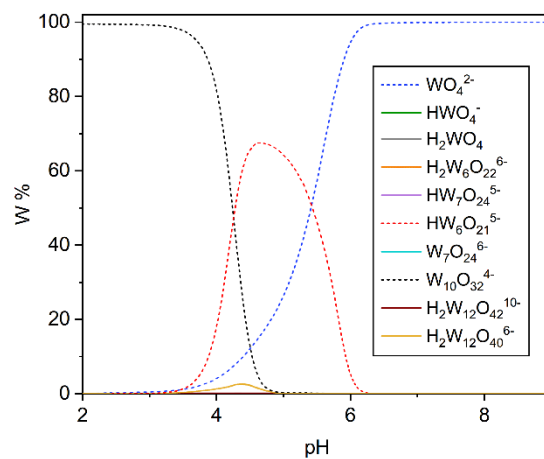

Figure S4. Aqueous tungstate speciation at total tungstate concentrations of 0.1 mM calculated using the program PHREEQC at ionic strength 0.01 M.
